# Supplementary material for: Identification of LARS as an essential gene for osteosarcoma proliferation through large-Scale CRISPR-Cas9 screening database and experimental verification
Source: J Transl Med. 2022 Aug 12;20:355. doi: 10.1186/s12967-022-03571-9 (PMC9373537; doi:10.1186/s12967-022-03571-9)
Supplement: Supplementary file 1 — Additional file 1: S1. A total of 785 genes critical for maintaining survival in 8 osteosarcoma cell lines. [file 12967_2022_3571_MOESM1_ESM.xlsx]

## Sheet: Additional S1
AARS
ABCB7
ABCE1
ABCF1
ACTL6A
ACTR10
ACTR2
AHCTF1
AKIRIN2
ALDOA
ALG11
ALG1L
ALG2
ANAPC1
ANAPC10
ANAPC11
ANAPC2
ANAPC4
ANAPC5
ANKLE2
AQR
ARCN1
ARL2
ARMC7
ATP2A2
ATP5MF
ATP6V0B
ATP6V0C
ATP6V1A
ATP6V1B2
ATP6V1E1
ATP6V1F
ATR
AURKA
AURKB
BANF1
BIRC5
BOP1
BRF1
BRF2
BRIX1
BUB1B
BUB3
BUD23
BUD31
BYSL
C1orf109
C1orf131
CACTIN
CARS
CCDC84
CCNA2
CCNH
CCNK
CCT2
CCT3
CCT4
CCT5
CCT6A
CCT7
CCT8
CDAN1
CDC123
CDC16
CDC20
CDC23
CDC27
CDC37
CDC42
CDC45
CDC5L
CDC6
CDC7
CDC73
CDCA8
CDK1
CDK7
CDK9
CDT1
CENPK
CENPN
CENPW
CFAP298
CHAF1A
CHAF1B
CHEK1
CHERP
CHMP2A
CHMP4B
CHMP6
CIAO1
CIAO2B
CIAO3
CKAP5
CLNS1A
CLP1
CLTC
CNIH4
CNOT3
COPA
COPB1
COPB2
COPE
COPG1
COPS5
COPS6
COPS8
COPZ1
CPSF1
CPSF2
CPSF3
CPSF4
CPSF6
CRCP
CRNKL1
CSE1L
CSTF1
CSTF3
CTCF
CTDP1
CWC22
DAD1
DARS
DBR1
DCTN5
DDB1
DDX10
DDX18
DDX20
DDX23
DDX24
DDX3X
DDX41
DDX42
DDX46
DDX47
DDX49
DDX51
DDX54
DDX55
DDX56
DHDDS
DHX15
DHX16
DHX33
DHX37
DHX8
DKC1
DNAJC17
DONSON
DPAGT1
DPH3
DTL
DUT
DYNC1H1
DYNC1I2
DYNLRB1
ECD
EEF1A1
EEF1G
EEF2
EEF2KMT
EFTUD2
EIF1AD
EIF1AX
EIF2B2
EIF2B3
EIF2B4
EIF2B5
EIF2S1
EIF2S2
EIF2S3
EIF3A
EIF3B
EIF3D
EIF3E
EIF3F
EIF3G
EIF3I
EIF4A1
EIF4A3
EIF4E
EIF5
EIF6
ELAC2
ELOB
ELOC
EPRS
ERCC3
ERH
ESF1
ESPL1
ESS2
ETF1
EXOSC2
EXOSC3
EXOSC4
EXOSC6
EXOSC7
EXOSC8
FARSA
FARSB
FAU
FBL
FCF1
FNTA
FOXD4
GARS
GBF1
GEMIN5
GGTLC2
GINS1
GINS2
GINS4
GNL2
GNL3
GPN1
GPN2
GPN3
GPS1
GRPEL1
GSPT1
GTF2A2
GTF2B
GTF2E1
GTF2E2
GTF2H1
GTPBP4
HARS
HAUS1
HAUS3
HAUS5
HAUS6
HAUS7
HAUS8
HCFC1
HEATR1
HINFP
HIST1H2AK
HIST1H2AL
HIST1H2BC
HIST1H2BD
HIST1H2BE
HIST1H2BJ
HIST1H2BN
HIST2H2AC
HIST2H3D
HMGCS1
HNRNPC
HNRNPH1
HNRNPK
HNRNPL
HSPA5
HSPA9
HSPD1
HSPE1
HYOU1
IARS
IGBP1
IK
ILF2
ILF3
IMP3
INCENP
INTS1
INTS11
INTS3
INTS4
INTS8
INTS9
IPO7
ISCU
ISY1
KANSL1
KANSL3
KARS
KAT8
KIF11
KIF18A
KIF23
KIN
KPNB1
KRR1
KRT8
LARS
LAS1L
LONP1
LRR1
LSG1
LSM11
LSM2
LSM3
LSM4
LSM5
LSM6
LSM7
LSM8
LTO1
LUC7L3
LYRM4
MAD2L1
MAK16
MARS
MASTL
MCM2
MCM4
MCM5
MCM6
MCM7
MDN1
MED11
MED14
MED17
MED21
MED22
MED28
MED30
MED31
MED4
MED6
MED8
MEPCE
MFAP1
MMS22L
MPHOSPH10
MTBP
MTOR
MTREX
MYC
MZT1
NAA10
NAA50
NACA
NAPA
NARS
NAT10
NCAPD2
NCAPG
NCBP1
NCBP2
NDC80
NEDD1
NEDD8
NELFB
NEPRO
NFS1
NIFK
NIP7
NKAP
NLE1
NMD3
NOB1
NOC4L
NOL10
NOL6
NOP16
NOP2
NOP56
NOP58
NPLOC4
NRDE2
NRF1
NSA2
NSF
NUBP1
NUBP2
NUDT21
NUF2
NUP133
NUP160
NUP205
NUP214
NUP85
NUP88
NUP93
NUS1
NUTF2
NVL
NXF1
OGT
OIP5
ORC1
ORC6
OSGEP
PABPN1
PAFAH1B1
PAM16
PCBP1
PCBP2
PCF11
PCNA
PDCD11
PDCD2
PDRG1
PES1
PFDN2
PFDN6
PHAX
PHB
PHB2
PHF5A
PLK1
PMF1
PMPCA
PMPCB
PNN
POLA2
POLD1
POLD2
POLD3
POLE
POLE2
POLR1A
POLR1B
POLR1C
POLR2B
POLR2C
POLR2D
POLR2E
POLR2F
POLR2G
POLR2H
POLR2I
POLR2L
POLR3A
POLR3B
POLR3C
POLR3F
POLR3H
POLR3K
POP5
PPAN
PPIL2
PPP1CB
PPP1R11
PPP1R8
PPWD1
PRC1
PREB
PRELID1
PRELID3B
PRIM1
PRMT5
PRPF19
PRPF31
PRPF38A
PRPF38B
PRPF4
PRPF6
PRPF8
PSMA1
PSMA2
PSMA3
PSMA4
PSMA5
PSMA6
PSMA7
PSMB1
PSMB2
PSMB3
PSMB4
PSMB5
PSMB6
PSMB7
PSMC1
PSMC2
PSMC3
PSMC4
PSMC5
PSMC6
PSMD1
PSMD11
PSMD12
PSMD14
PSMD2
PSMD3
PSMD4
PSMD6
PSMD7
PSMD8
PSMG3
PSMG4
PUF60
PWP2
QARS
RABGGTA
RABGGTB
RACGAP1
RACK1
RAD21
RAD51
RAE1
RAN
RANGAP1
RBBP4
RBM14
RBM17
RBM19
RBM22
RBM25
RBM39
RBM8A
RBMX
RBMX2
RBX1
RCC1
RFC2
RFC3
RFC5
RIOK2
RNF113A
RNGTT
RNPC3
RNPS1
RPA1
RPA2
RPA3
RPAIN
RPAP1
RPAP2
RPL10A
RPL11
RPL12
RPL13
RPL13A
RPL14
RPL15
RPL18
RPL18A
RPL19
RPL21
RPL23
RPL23A
RPL24
RPL26
RPL27
RPL27A
RPL3
RPL30
RPL31
RPL32
RPL35
RPL35A
RPL36
RPL37
RPL37A
RPL38
RPL4
RPL5
RPL6
RPL7
RPL8
RPLP0
RPLP1
RPLP2
RPP21
RPP30
RPP40
RPS10
RPS11
RPS12
RPS13
RPS15
RPS15A
RPS16
RPS18
RPS19
RPS2
RPS20
RPS21
RPS23
RPS24
RPS25
RPS27A
RPS29
RPS3
RPS4X
RPS5
RPS6
RPS7
RPS8
RPS9
RPSA
RRM1
RRM2
RRN3
RRP12
RRS1
RSL1D1
RTF2
RUVBL1
RUVBL2
SACM1L
SAE1
SAP18
SAP30BP
SARS
SART1
SART3
SBDS
SBNO1
SCFD1
SDAD1
SDE2
SEC13
SEC61A1
SEC61G
SEH1L
SF1
SF3A1
SF3A2
SF3A3
SF3B1
SF3B2
SF3B3
SF3B4
SF3B5
SF3B6
SFPQ
SIN3A
SKP1
SLC39A7
SLU7
SMC1A
SMC2
SMC3
SMC4
SMG1
SMR3B
SMU1
SNAPC1
SNAPC2
SNAPC3
SNAPC4
SNAPC5
SNRNP200
SNRNP25
SNRNP27
SNRNP35
SNRNP70
SNRPA1
SNRPB
SNRPC
SNRPD1
SNRPD2
SNRPD3
SNRPF
SNU13
SNW1
SOD1
SPATA5L1
SPC24
SPC25
SPCS2
SPCS3
SPDL1
SPOUT1
SRBD1
SRCAP
SRP14
SRP19
SRP54
SRP72
SRP9
SRRM1
SRSF1
SRSF2
SRSF3
SRSF7
SS18L2
SSRP1
SSU72
STX5
SUPT16H
SUPT5H
SUPT6H
SYMPK
SYS1
TAF1C
TAF6
TANGO6
TARS
TBCB
TBCD
TBL3
TCP1
THAP1
THOC1
THOC2
THOC3
THOC5
THOC7
TICRR
TIGD1
TIMELESS
TIMM10
TINF2
TIPIN
TNPO3
TOMM22
TOMM40
TONSL
TOP2A
TOPBP1
TPX2
TRAPPC11
TRAPPC3
TRAPPC4
TRAPPC8
TRIAP1
TRMT112
TRRAP
TSG101
TSR1
TSR2
TTC27
TUBA1B
TUBB
TUBG1
TUBGCP2
TUBGCP3
TUBGCP5
TUT1
TWISTNB
TXNL4A
TXNL4B
U2AF2
U2SURP
UBA1
UBA2
UBA52
UBE2I
UBL5
UBTF
UFD1
UPF2
URI1
USP36
USP39
USP5
USPL1
UTP11
UTP15
UTP20
UTP4
VARS
VCP
VHL
VIRMA
VPS25
VPS28
WARS
WBP11
WDHD1
WDR12
WDR33
WDR43
WDR46
WDR5
WDR55
WDR70
WDR74
WDR75
WDR77
WDR82
WEE1
XAB2
XPO1
XRCC5
XRCC6
YAE1
YARS
YBX1
YJU2
YKT6
ZBTB11
ZMAT2
ZMAT5
ZNF131
ZNF207
ZNF335
ZNF830
ZNHIT2
ZPR1
ZRSR2
