# Supplementary material for: Identification of LARS as an essential gene for osteosarcoma proliferation through large-Scale CRISPR-Cas9 screening database and experimental verification
Source: J Transl Med. 2022 Aug 12;20:355. doi: 10.1186/s12967-022-03571-9 (PMC9373537; doi:10.1186/s12967-022-03571-9)
Supplement: Supplementary file 3 — Additional file 3: S3. The relationship between the drug sensitivity and the expression of LARS and DNAJC17 based on the data from the GDSC. [file 12967_2022_3571_MOESM3_ESM.xlsx]

## Sheet: SheetName
symbol	drug	cor	fdr	entrez
DNAJC17	16-beta-bromoandrosterone	-0.0670158	0.162496	55192
DNAJC17	1S,3R-RSL-3	-0.0904472	0.0246727	55192
DNAJC17	3-Cl-AHPC	-0.136022	0.000366189	55192
DNAJC17	968	0.0404659	0.990749	55192
DNAJC17	A-804598	0.0344657	0.853989	55192
DNAJC17	AA-COCF3	-0.127129	0.00183056	55192
DNAJC17	ABT-199	-0.13385	0.0121684	55192
DNAJC17	ABT-737	-0.0566812	0.220011	55192
DNAJC17	AC55649	-0.00521879	0.979969	55192
DNAJC17	AGK-2	-0.0174508	0.968515	55192
DNAJC17	AM-580	-0.0647898	0.203302	55192
DNAJC17	AT-406	-0.00583406	0.967601	55192
DNAJC17	AT13387	-0.170785	0.00292788	55192
DNAJC17	AT7867	-0.11538	0.00405097	55192
DNAJC17	AZ-3146	-0.111842	0.00609864	55192
DNAJC17	AZD1480	-0.165365	0.0112222	55192
DNAJC17	AZD4547	-0.11008	0.0131071	55192
DNAJC17	AZD6482	-0.0133347	0.861079	55192
DNAJC17	AZD7545	-0.0870722	0.0406377	55192
DNAJC17	AZD7762	-0.166456	9.47757e-06	55192
DNAJC17	AZD8055	-0.0546492	0.186787	55192
DNAJC17	B02	-0.107818	0.00722653	55192
DNAJC17	BCL-LZH-4	-0.00842908	0.97762	55192
DNAJC17	BEC	0.0944033	0.999979	55192
DNAJC17	BI-2536	-0.196166	7.72028e-08	55192
DNAJC17	BIBR-1532	-0.0607484	0.193849	55192
DNAJC17	BIRB-796	-0.0540348	0.247268	55192
DNAJC17	BIX-01294	-0.147246	0.000124196	55192
DNAJC17	BMS-195614	0.0121143	0.879907	55192
DNAJC17	BMS-270394	-0.105023	0.0156767	55192
DNAJC17	BMS-345541	-0.140752	0.000284138	55192
DNAJC17	BMS-536924	-0.00289052	0.968339	55192
DNAJC17	BMS-754807	-0.0604123	0.189343	55192
DNAJC17	BRD-A02303741	-0.0111013	0.871834	55192
DNAJC17	BRD-A05715709	0.0139401	0.939702	55192
DNAJC17	BRD-A71883111	-0.103585	0.0137098	55192
DNAJC17	BRD-A86708339	-0.0453069	0.480307	55192
DNAJC17	BRD-A94377914	-0.120656	0.0310706	55192
DNAJC17	BRD-K01737880	-0.0490717	0.840706	55192
DNAJC17	BRD-K02251932	-0.0978973	0.0412388	55192
DNAJC17	BRD-K02492147	0.0423345	0.490627	55192
DNAJC17	BRD-K04800985	-0.0377821	0.99881	55192
DNAJC17	BRD-K09344309	0.120524	0.777554	55192
DNAJC17	BRD-K09587429	0.0489788	0.455116	55192
DNAJC17	BRD-K11533227	-0.0668043	0.131643	55192
DNAJC17	BRD-K13999467	-0.0587888	0.183422	55192
DNAJC17	BRD-K14844214	-0.0681535	0.301746	55192
DNAJC17	BRD-K16147474	0.00695537	0.991199	55192
DNAJC17	BRD-K17060750	0.119469	0.0101555	55192
DNAJC17	BRD-K19103580	-0.0148615	0.805009	55192
DNAJC17	BRD-K24690302	-0.0676909	0.116972	55192
DNAJC17	BRD-K26531177	-0.12959	0.0013556	55192
DNAJC17	BRD-K27224038	0.00754919	0.983908	55192
DNAJC17	BRD-K27986637	-0.0283695	0.891853	55192
DNAJC17	BRD-K28456706	-0.114321	0.00508252	55192
DNAJC17	BRD-K29086754	-0.0231331	0.94165	55192
DNAJC17	BRD-K29313308	-0.128537	0.00175835	55192
DNAJC17	BRD-K30019337	0.0292395	0.940709	55192
DNAJC17	BRD-K30748066	-0.264969	0.113189	55192
DNAJC17	BRD-K33199242	-0.0241461	0.969641	55192
DNAJC17	BRD-K33514849	-0.243722	0.999288	55192
DNAJC17	BRD-K34099515	-0.00838278	0.994409	55192
DNAJC17	BRD-K34222889	-0.19543	1.5844e-07	55192
DNAJC17	BRD-K34485477	0.0341175	0.998562	55192
DNAJC17	BRD-K35604418	-0.137078	0.000436181	55192
DNAJC17	BRD-K37390332	0.0112242	0.980377	55192
DNAJC17	BRD-K41334119	0.000825425	0.998208	55192
DNAJC17	BRD-K41597374	-0.0591749	0.154636	55192
DNAJC17	BRD-K42260513	-0.015475	0.998533	55192
DNAJC17	BRD-K44224150	-0.00543086	0.998293	55192
DNAJC17	BRD-K45681478	-0.0766438	0.0844489	55192
DNAJC17	BRD-K48334597	0.00155967	0.993414	55192
DNAJC17	BRD-K48477130	-0.081585	0.674502	55192
DNAJC17	BRD-K49290616	0.174059	0.570583	55192
DNAJC17	BRD-K50799972	-0.0732933	0.263826	55192
DNAJC17	BRD-K51490254	-0.0253384	0.581645	55192
DNAJC17	BRD-K51831558	-0.110413	0.107979	55192
DNAJC17	BRD-K52037352	-0.047056	0.480888	55192
DNAJC17	BRD-K55116708	-0.157708	0.000171243	55192
DNAJC17	BRD-K61166597	-0.140436	0.000369964	55192
DNAJC17	BRD-K63431240	-0.10176	0.0148375	55192
DNAJC17	BRD-K64610608	0.121862	0.252691	55192
DNAJC17	BRD-K66453893	-0.198531	1.0467e-07	55192
DNAJC17	BRD-K66532283	-0.148613	0.000165911	55192
DNAJC17	BRD-K70511574	-0.239516	9.7291e-11	55192
DNAJC17	BRD-K71781559	-0.017443	0.994585	55192
DNAJC17	BRD-K75293299	0.120116	0.588906	55192
DNAJC17	BRD-K78574327	0.0420106	0.976953	55192
DNAJC17	BRD-K80183349	-0.130951	0.000772833	55192
DNAJC17	BRD-K84807411	0.00457404	0.99106	55192
DNAJC17	BRD-K85133207	-0.136537	0.00123219	55192
DNAJC17	BRD-K86535717	0.118291	0.680888	55192
DNAJC17	BRD-K88742110	-0.10668	0.00915475	55192
DNAJC17	BRD-K90370028	-0.0296652	0.955042	55192
DNAJC17	BRD-K92856060	-0.0685965	0.106095	55192
DNAJC17	BRD-K96431673	0.146333	0.985799	55192
DNAJC17	BRD-K96970199	-0.0294421	0.998764	55192
DNAJC17	BRD-K97651142	-0.0354361	0.428324	55192
DNAJC17	BRD-K99006945	-0.0220193	0.788903	55192
DNAJC17	BRD-M00053801	0.0114603	0.935986	55192
DNAJC17	BRD1378	0.00861258	0.955864	55192
DNAJC17	BRD1812	-0.117202	0.0031254	55192
DNAJC17	BRD1835	-0.0678992	0.152713	55192
DNAJC17	BRD4132	0.0741937	0.219735	55192
DNAJC17	BRD5468	-0.0190923	0.864015	55192
DNAJC17	BRD6340	-0.142168	0.000278	55192
DNAJC17	BRD8899	0.0385679	0.736469	55192
DNAJC17	BRD8958	0.0249543	0.982209	55192
DNAJC17	BRD9647	-0.0270963	0.637446	55192
DNAJC17	BRD9876	-0.0118802	0.877149	55192
DNAJC17	BYL-719	-0.0525685	0.454088	55192
DNAJC17	Bax channel blocker	-0.107837	0.0126727	55192
DNAJC17	C6-ceramide	0.0546582	0.612137	55192
DNAJC17	CAL-101	-0.0490535	0.426249	55192
DNAJC17	CAY10576	0.0941701	0.15992	55192
DNAJC17	CAY10594	0.0340546	0.593415	55192
DNAJC17	CAY10618	-0.123652	0.0014268	55192
DNAJC17	CBB-1007	0.0240704	0.91502	55192
DNAJC17	CCT036477	-0.141379	0.000238564	55192
DNAJC17	CD-1530	-0.0456817	0.42058	55192
DNAJC17	CD-437	-0.224214	1.62917e-09	55192
DNAJC17	CHIR-99021	-0.186717	2.88861e-06	55192
DNAJC17	CHM-1	-0.174665	2.81528e-06	55192
DNAJC17	CI-976	0.0383555	0.804904	55192
DNAJC17	CID-5951923	0.0962046	0.217238	55192
DNAJC17	CIL41	-0.0524677	0.480568	55192
DNAJC17	CIL55	-0.0105975	0.970741	55192
DNAJC17	CIL55A	-0.112439	0.0589372	55192
DNAJC17	CIL56	-0.106967	0.0743856	55192
DNAJC17	CIL70	-0.0932893	0.11077	55192
DNAJC17	COL-3	-0.14	0.00198414	55192
DNAJC17	CR-1-31B	-0.17932	1.18117e-06	55192
DNAJC17	Ch-55	-0.0855868	0.0625723	55192
DNAJC17	Compound 1541A	0.000177063	0.998851	55192
DNAJC17	Compound 23 citrate	-0.188665	8.77368e-07	55192
DNAJC17	Compound 7d-cis	-0.127013	0.00275893	55192
DNAJC17	DBeQ	-0.0105543	0.833796	55192
DNAJC17	DNMDP	0.00774062	0.93644	55192
DNAJC17	ELCPK	-0.148587	0.0111697	55192
DNAJC17	ETP-46464	-0.118944	0.0198396	55192
DNAJC17	EX-527	0.0506975	0.666105	55192
DNAJC17	FGIN-1-27	0.139853	0.229635	55192
DNAJC17	FQI-1	-0.168326	0.00189807	55192
DNAJC17	FQI-2	-0.209257	1.25915e-08	55192
DNAJC17	FSC231	0.104234	0.99945	55192
DNAJC17	GANT-61	-0.0589324	0.3077	55192
DNAJC17	GDC-0879	0.00642336	0.932299	55192
DNAJC17	GDC-0941	-0.0908854	0.0366778	55192
DNAJC17	GMX-1778	-0.0813111	0.0480974	55192
DNAJC17	GSK-3 inhibitor IX	-0.0973761	0.0202308	55192
DNAJC17	GSK-J4	-0.219938	0.155193	55192
DNAJC17	GSK1059615	-0.014308	0.972069	55192
DNAJC17	GSK2636771	0.00495696	0.973749	55192
DNAJC17	GSK4112	-0.0305666	0.574087	55192
DNAJC17	GSK461364	-0.234598	2.53094e-10	55192
DNAJC17	GSK525762A	-0.136306	0.000296945	55192
DNAJC17	GW-405833	-0.137143	0.00034113	55192
DNAJC17	GW-843682X	-0.21649	2.84131e-08	55192
DNAJC17	HBX-41108	-0.0447855	0.454779	55192
DNAJC17	HC-067047	-0.0385844	0.552859	55192
DNAJC17	HLI 373	-0.107049	0.00887756	55192
DNAJC17	I-BET151	-0.145764	9.2177e-05	55192
DNAJC17	IC-87114	-0.0106693	0.913229	55192
DNAJC17	IPR-456	0.0965744	0.342584	55192
DNAJC17	ISOX	-0.142313	0.000181547	55192
DNAJC17	IU1	-0.0169046	0.886748	55192
DNAJC17	JQ-1	-0.158034	2.4588e-05	55192
DNAJC17	JW-480	0.0527402	0.777593	55192
DNAJC17	JW-55	0.049724	0.721119	55192
DNAJC17	JW-74	-0.0885086	0.259949	55192
DNAJC17	KH-CB19	0.0323213	0.784583	55192
DNAJC17	KHS101	-0.0594744	0.172491	55192
DNAJC17	KPT185	-0.194225	1.0035e-05	55192
DNAJC17	KU 0060648	-0.143109	0.000270085	55192
DNAJC17	KU-0063794	-0.080552	0.04896	55192
DNAJC17	KU-55933	-0.112075	0.00741438	55192
DNAJC17	KU-60019	-0.14773	0.00012155	55192
DNAJC17	KW-2449	-0.163911	1.2745e-05	55192
DNAJC17	KX2-391	-0.219984	3.6583e-09	55192
DNAJC17	Ki8751	-0.0618533	0.168978	55192
DNAJC17	Ko-143	-0.0784273	0.0532998	55192
DNAJC17	L-685458	0.0098909	0.901299	55192
DNAJC17	LE-135	-0.0823259	0.0574553	55192
DNAJC17	LRRK2-IN-1	-0.18525	3.6628e-05	55192
DNAJC17	LY-2157299	-0.0521969	0.84527	55192
DNAJC17	LY-2183240	-0.22967	4.25749e-10	55192
DNAJC17	MG-132	0.00674756	0.951202	55192
DNAJC17	MGCD-265	-0.136618	0.000386646	55192
DNAJC17	MI-1	-0.00785406	0.950235	55192
DNAJC17	MI-2	-0.0414184	0.572207	55192
DNAJC17	MK-0752	0.0186269	0.82992	55192
DNAJC17	MK-1775	-0.170649	8.16272e-06	55192
DNAJC17	MK-2206	-0.123722	0.00321558	55192
DNAJC17	ML006	-0.0321273	0.574656	55192
DNAJC17	ML029	-0.08934	0.0402617	55192
DNAJC17	ML031	-0.0364046	0.430825	55192
DNAJC17	ML050	-0.0745153	0.0825978	55192
DNAJC17	ML083	0.0265815	0.851285	55192
DNAJC17	ML162	-0.0580039	0.17711	55192
DNAJC17	ML203	-0.0589409	0.258198	55192
DNAJC17	ML210	-0.0951958	0.0196589	55192
DNAJC17	ML239	-0.0475666	0.288574	55192
DNAJC17	ML258	0.0207809	0.865595	55192
DNAJC17	ML311	-0.198163	7.32707e-08	55192
DNAJC17	ML312	0.0848356	0.961818	55192
DNAJC17	ML320	-0.126789	0.00340567	55192
DNAJC17	ML334 diastereomer	0.0513879	0.487232	55192
DNAJC17	MLN2238	-0.0749735	0.0596595	55192
DNAJC17	MLN2480	0.0319244	0.794938	55192
DNAJC17	MST-312	-0.0637126	0.107988	55192
DNAJC17	Mdivi-1	-0.107628	0.00891381	55192
DNAJC17	Merck60	-0.116131	0.00223995	55192
DNAJC17	N9-isopropylolomoucine	-0.154959	9.6328e-05	55192
DNAJC17	NPC-26	-0.00143687	0.995342	55192
DNAJC17	NSC 74859	-0.0841048	0.0885003	55192
DNAJC17	NSC19630	-0.183977	7.0249e-05	55192
DNAJC17	NSC23766	-0.106872	0.00790343	55192
DNAJC17	NSC30930	0.0508014	0.465535	55192
DNAJC17	NSC48300	-0.18586	8.47117e-07	55192
DNAJC17	NSC632839	-0.173017	4.20593e-06	55192
DNAJC17	NSC95397	-0.147767	0.000254186	55192
DNAJC17	NVP-231	-0.170861	6.35492e-06	55192
DNAJC17	NVP-ADW742	-0.0970794	0.0239265	55192
DNAJC17	NVP-BEZ235	-0.125831	0.0100783	55192
DNAJC17	NVP-BSK805	-0.173716	6.14001e-06	55192
DNAJC17	NVP-TAE684	-0.0828337	0.0693369	55192
DNAJC17	O-6-benzylguanine	0.0128737	0.94139	55192
DNAJC17	OSI-027	-0.0982738	0.0180356	55192
DNAJC17	OSI-930	-0.243081	5.7573e-09	55192
DNAJC17	PAC-1	-0.118998	0.00266095	55192
DNAJC17	PD 153035	0.0134332	0.852826	55192
DNAJC17	PD318088	0.0388058	0.453244	55192
DNAJC17	PDMP	-0.114395	0.00585617	55192
DNAJC17	PF-184	-0.145439	0.000173368	55192
DNAJC17	PF-3758309	-0.172472	0.00182297	55192
DNAJC17	PF-4800567 hydrochloride	0.0160774	0.999586	55192
DNAJC17	PF-543	-0.0907578	0.0440568	55192
DNAJC17	PF-573228	-0.166755	1.3408e-05	55192
DNAJC17	PF-750	-0.0405665	0.420627	55192
DNAJC17	PHA-793887	-0.171093	4.17256e-06	55192
DNAJC17	PI-103	-0.0556828	0.193092	55192
DNAJC17	PIK-93	-0.1456	0.000275138	55192
DNAJC17	PL-DI	-0.190903	4.01519e-07	55192
DNAJC17	PLX-4720	-0.0672042	0.310183	55192
DNAJC17	PRIMA-1	-0.174773	6.24103e-06	55192
DNAJC17	PRIMA-1-Met	-0.0604578	0.409008	55192
DNAJC17	PRL-3 inhibitor I	0.0326215	0.823316	55192
DNAJC17	PX-12	-0.243464	5.36639e-11	55192
DNAJC17	PYR-41	-0.0368738	0.514463	55192
DNAJC17	QS-11	-0.0764706	0.768232	55192
DNAJC17	QW-BI-011	-0.0873655	0.355894	55192
DNAJC17	R428	-0.0762563	0.139527	55192
DNAJC17	RAF265	-0.0908828	0.0829136	55192
DNAJC17	RG-108	-0.0963876	0.0246825	55192
DNAJC17	RITA	-0.141503	0.000420938	55192
DNAJC17	RO4929097	-0.0805562	0.285761	55192
DNAJC17	Repligen 136	-0.129409	0.00189285	55192
DNAJC17	SB-225002	-0.198073	6.66879e-08	55192
DNAJC17	SB-431542	-0.0164245	0.900992	55192
DNAJC17	SB-525334	0.0327166	0.565879	55192
DNAJC17	SB-743921	-0.190553	1.95588e-07	55192
DNAJC17	SCH-529074	-0.0307089	0.549983	55192
DNAJC17	SCH-79797	-0.132519	0.000572786	55192
DNAJC17	SGX-523	0.0556542	0.34041	55192
DNAJC17	SID 26681509	-0.0693504	0.131102	55192
DNAJC17	SJ-172550	0.0195206	0.888699	55192
DNAJC17	SKI-II	-0.0111474	0.835632	55192
DNAJC17	SMER-3	-0.108247	0.0142156	55192
DNAJC17	SN-38	-0.173402	3.8529e-05	55192
DNAJC17	SNS-032	-0.101699	0.0132371	55192
DNAJC17	SNX-2112	-0.238023	7.14625e-11	55192
DNAJC17	SR-II-138A	-0.195154	8.59984e-08	55192
DNAJC17	SR1001	-0.0558091	0.41687	55192
DNAJC17	SR8278	-0.0598162	0.876462	55192
DNAJC17	SRT-1720	-0.099564	0.0223675	55192
DNAJC17	STF-31	-0.127035	0.00135766	55192
DNAJC17	SU11274	-0.043426	0.30896	55192
DNAJC17	SZ4TA2	0.0602149	0.608167	55192
DNAJC17	StemRegenin 1	-0.108625	0.00651541	55192
DNAJC17	TG-100-115	-0.100693	0.0333922	55192
DNAJC17	TG-101348	-0.174333	6.65263e-06	55192
DNAJC17	TGX-221	-0.0460266	0.536352	55192
DNAJC17	TPCA-1	-0.157813	3.657e-05	55192
DNAJC17	TW-37	-0.0566981	0.174827	55192
DNAJC17	UNC0321	0.0271396	0.83487	55192
DNAJC17	UNC0638	-0.101539	0.0149316	55192
DNAJC17	VAF-347	0.11755	0.045769	55192
DNAJC17	VER-155008	-0.0517216	0.234418	55192
DNAJC17	VU0155056	0.0566995	0.835234	55192
DNAJC17	WAY-362450	0.053499	0.998521	55192
DNAJC17	WP1130	-0.111468	0.00537113	55192
DNAJC17	WZ4002	-0.0168999	0.851043	55192
DNAJC17	WZ8040	-0.037236	0.502362	55192
DNAJC17	XL765	-0.0599314	0.295099	55192
DNAJC17	YK 4-279	-0.221913	1.72631e-09	55192
DNAJC17	YM-155	0.0343083	0.509211	55192
DNAJC17	ZSTK474	-0.0524544	0.338261	55192
DNAJC17	abiraterone	0.187872	0.111955	55192
DNAJC17	afatinib	-0.0272559	0.608009	55192
DNAJC17	alisertib	-0.126859	0.000979831	55192
DNAJC17	alvocidib	-0.119094	0.0397014	55192
DNAJC17	apicidin	-0.117724	0.00180075	55192
DNAJC17	austocystin D	0.0552467	0.253117	55192
DNAJC17	avicin D	-0.108323	0.179064	55192
DNAJC17	avrainvillamide	-0.210197	4.77688e-06	55192
DNAJC17	axitinib	-0.121277	0.00165603	55192
DNAJC17	azacitidine	-0.080817	0.0841337	55192
DNAJC17	bafilomycin A1	-0.170158	0.707603	55192
DNAJC17	barasertib	-0.133801	0.00054145	55192
DNAJC17	bardoxolone methyl	-0.124451	0.00272927	55192
DNAJC17	belinostat	-0.178558	0.0011231	55192
DNAJC17	bendamustine	-0.0972955	0.0222867	55192
DNAJC17	betulinic acid	0.0752435	0.608201	55192
DNAJC17	bexarotene	-0.0936297	0.0281111	55192
DNAJC17	birinapant	0.00825767	0.92703	55192
DNAJC17	blebbistatin	-0.00824575	0.9918	55192
DNAJC17	bleomycin A2	-0.120842	0.0130035	55192
DNAJC17	bortezomib	-0.0606075	0.138509	55192
DNAJC17	bosutinib	-0.112608	0.00533282	55192
DNAJC17	brefeldin A	-0.0684695	0.128593	55192
DNAJC17	brivanib	-0.114703	0.0041572	55192
DNAJC17	cabozantinib	-0.0701047	0.138798	55192
DNAJC17	canertinib	-0.0702792	0.126123	55192
DNAJC17	cediranib	-0.0292754	0.844491	55192
DNAJC17	ceranib-2	-0.17642	1.94649e-06	55192
DNAJC17	cerulenin	-0.149739	8.685e-05	55192
DNAJC17	chlorambucil	-0.1932	3.51251e-07	55192
DNAJC17	ciclopirox	-0.166942	6.69955e-06	55192
DNAJC17	ciclosporin	-0.0604643	0.264658	55192
DNAJC17	cimetidine	0.0173142	0.99519	55192
DNAJC17	clofarabine	-0.233677	1.42152e-10	55192
DNAJC17	crizotinib	-0.16224	2.1369e-05	55192
DNAJC17	cucurbitacin I	-0.0992979	0.0146956	55192
DNAJC17	curcumin	-0.132699	0.000537711	55192
DNAJC17	cyanoquinoline 11	-0.00864789	0.943687	55192
DNAJC17	cyclophosphamide	0.0948349	0.993392	55192
DNAJC17	cytarabine hydrochloride	-0.254165	3.3641e-12	55192
DNAJC17	cytochalasin B	-0.0241489	0.68736	55192
DNAJC17	dabrafenib	-0.00584857	0.95568	55192
DNAJC17	dacarbazine	-0.155244	4.9321e-05	55192
DNAJC17	daporinad	-0.132384	0.00208944	55192
DNAJC17	darinaparsin	-0.0900871	0.161761	55192
DNAJC17	dasatinib	0.0191593	0.737911	55192
DNAJC17	decitabine	-0.187748	3.86439e-07	55192
DNAJC17	dexamethasone	-0.102584	0.0139384	55192
DNAJC17	dinaciclib	-0.153637	0.00603408	55192
DNAJC17	docetaxel	-0.241271	2.0825e-05	55192
DNAJC17	doxorubicin	-0.191206	1.78411e-07	55192
DNAJC17	elocalcitol	-0.152774	7.1059e-05	55192
DNAJC17	entinostat	-0.102423	0.00832581	55192
DNAJC17	epigallocatechin-3-monogallate	-0.153178	0.000312006	55192
DNAJC17	erastin	-0.0911298	0.0293654	55192
DNAJC17	erismodegib	0.0558629	0.461272	55192
DNAJC17	erlotinib	-0.00859612	0.881818	55192
DNAJC17	etomoxir	-0.0463348	0.948445	55192
DNAJC17	etoposide	-0.171247	4.56174e-06	55192
DNAJC17	fingolimod	-0.119932	0.00221692	55192
DNAJC17	fluorouracil	-0.149629	8.8266e-05	55192
DNAJC17	fluvastatin	-0.0211193	0.73439	55192
DNAJC17	foretinib	-0.109434	0.00759133	55192
DNAJC17	fulvestrant	0.116591	0.718733	55192
DNAJC17	fumonisin B1	-0.0923485	0.0735053	55192
DNAJC17	gefitinib	0.0108347	0.872161	55192
DNAJC17	gemcitabine	-0.184767	2.31983e-06	55192
DNAJC17	gossypol	-0.0629762	0.127429	55192
DNAJC17	hyperforin	0.0862168	0.249211	55192
DNAJC17	ibrutinib	-0.0680757	0.243689	55192
DNAJC17	ifosfamide	0.0139231	0.956846	55192
DNAJC17	imatinib	-0.161203	6.8401e-05	55192
DNAJC17	importazole	-0.0548823	0.378641	55192
DNAJC17	indisulam	-0.193019	5.49978e-07	55192
DNAJC17	isoevodiamine	-0.203913	3.90366e-08	55192
DNAJC17	isoliquiritigenin	-0.0846679	0.345146	55192
DNAJC17	isonicotinohydroxamic acid	0.0435329	0.984543	55192
DNAJC17	istradefylline	-0.0415985	0.818691	55192
DNAJC17	itraconazole	0.0304951	0.69766	55192
DNAJC17	lapatinib	-0.0476006	0.311241	55192
DNAJC17	lenvatinib	-0.0521069	0.263696	55192
DNAJC17	leptomycin B	-0.173052	2.46604e-06	55192
DNAJC17	linifanib	-0.130395	0.000678494	55192
DNAJC17	linsitinib	-0.0596627	0.178074	55192
DNAJC17	lomeguatrib	-0.00947721	0.892623	55192
DNAJC17	lovastatin	-0.0418124	0.438205	55192
DNAJC17	manumycin A	-0.203659	4.55163e-08	55192
DNAJC17	marinopyrrole A	-0.126382	0.0117297	55192
DNAJC17	masitinib	-0.151299	0.000154051	55192
DNAJC17	methotrexate	-0.0792618	0.0566843	55192
DNAJC17	methylstat	-0.128265	0.00692824	55192
DNAJC17	mitomycin	-0.144266	0.000150275	55192
DNAJC17	momelotinib	-0.134799	0.000748083	55192
DNAJC17	myricetin	0.0171283	0.899892	55192
DNAJC17	myriocin	0.0363373	0.948334	55192
DNAJC17	nakiterpiosin	-0.218816	4.23916e-09	55192
DNAJC17	narciclasine	-0.233549	4.42634e-10	55192
DNAJC17	navitoclax	-0.0602502	0.166807	55192
DNAJC17	necrostatin-1	-0.0798915	0.0825965	55192
DNAJC17	necrostatin-7	-0.0582906	0.206728	55192
DNAJC17	necrosulfonamide	-0.202642	1.0078e-05	55192
DNAJC17	nelarabine	0.0161331	0.965783	55192
DNAJC17	neopeltolide	-0.105361	0.265679	55192
DNAJC17	neratinib	-0.0990398	0.0183546	55192
DNAJC17	neuronal differentiation inducer III	-0.10901	0.0046626	55192
DNAJC17	niclosamide	-0.0129882	0.803919	55192
DNAJC17	nilotinib	-0.0307752	0.733649	55192
DNAJC17	nintedanib	-0.0352774	0.551241	55192
DNAJC17	nutlin-3	-0.108305	0.00678102	55192
DNAJC17	obatoclax	-0.126983	0.000903156	55192
DNAJC17	olaparib	-0.136194	0.000463591	55192
DNAJC17	oligomycin A	-0.00673982	0.885429	55192
DNAJC17	omacetaxine mepesuccinate	-0.136625	0.00248631	55192
DNAJC17	ouabain	-0.161124	1.7677e-05	55192
DNAJC17	paclitaxel	-0.207979	2.99494e-08	55192
DNAJC17	palmostatin B	-0.0183516	0.899128	55192
DNAJC17	pandacostat	-0.0530869	0.259711	55192
DNAJC17	panobinostat	-0.127188	0.000721702	55192
DNAJC17	parbendazole	-0.24199	2.44941e-11	55192
DNAJC17	parthenolide	-0.00864637	0.90179	55192
DNAJC17	pazopanib	-0.128436	0.0010262	55192
DNAJC17	pevonedistat	-0.210619	3.90699e-08	55192
DNAJC17	phloretin	-0.105041	0.00741971	55192
DNAJC17	pifithrin-alpha	-0.0575534	0.334154	55192
DNAJC17	pifithrin-mu	-0.134551	0.000544021	55192
DNAJC17	piperlongumine	-0.194027	1.69037e-07	55192
DNAJC17	pitstop2	-0.0235771	0.924561	55192
DNAJC17	pluripotin	-0.0448051	0.386055	55192
DNAJC17	procarbazine	-0.00483494	0.987439	55192
DNAJC17	prochlorperazine	-0.0901747	0.0410934	55192
DNAJC17	purmorphamine	-0.00185301	0.975579	55192
DNAJC17	pyrazolanthrone	-0.075797	0.112044	55192
DNAJC17	quizartinib	-0.00958395	0.897386	55192
DNAJC17	regorafenib	-0.00486444	0.940229	55192
DNAJC17	rigosertib	-0.238239	2.58076e-10	55192
DNAJC17	ruxolitinib	-0.136678	0.000649328	55192
DNAJC17	salermide	-0.02794	0.811652	55192
DNAJC17	saracatinib	0.0163025	0.783329	55192
DNAJC17	selumetinib	0.0154123	0.799782	55192
DNAJC17	semagacestat	-0.00949729	0.961149	55192
DNAJC17	serdemetan	-0.134341	0.000740433	55192
DNAJC17	sildenafil	-0.0549096	0.647822	55192
DNAJC17	silmitasertib	-0.0279358	0.766172	55192
DNAJC17	simvastatin	-0.0176957	0.803311	55192
DNAJC17	sirolimus	-0.122432	0.00167592	55192
DNAJC17	sitagliptin	0.0775568	0.997718	55192
DNAJC17	skepinone-L	-0.0728919	0.255747	55192
DNAJC17	sorafenib	0.00932969	0.856276	55192
DNAJC17	sotrastaurin	-0.181556	6.5399e-05	55192
DNAJC17	spautin-1	-0.0388736	0.446658	55192
DNAJC17	staurosporine	-0.138964	0.21869	55192
DNAJC17	sunitinib	-0.110916	0.00524687	55192
DNAJC17	tacedinaline	-0.169142	0.000199979	55192
DNAJC17	tacrolimus	-0.110226	0.00807733	55192
DNAJC17	tamatinib	-0.0714862	0.329039	55192
DNAJC17	tamoxifen	-0.0703981	0.253473	55192
DNAJC17	tandutinib	-0.0321032	0.507356	55192
DNAJC17	tanespimycin	-0.0558546	0.289353	55192
DNAJC17	temozolomide	-0.131619	0.0287707	55192
DNAJC17	temsirolimus	-0.127842	0.0322986	55192
DNAJC17	teniposide	-0.210965	5.8646e-05	55192
DNAJC17	thalidomide	-0.0318728	0.89433	55192
DNAJC17	tigecycline	-0.192146	0.000740495	55192
DNAJC17	tipifarnib-P1	-0.117364	0.00273982	55192
DNAJC17	tipifarnib-P2	-0.171954	0.00129587	55192
DNAJC17	tivantinib	-0.23671	1.506e-05	55192
DNAJC17	tivozanib	-0.0576895	0.236527	55192
DNAJC17	topotecan	-0.19225	1.71509e-07	55192
DNAJC17	tosedostat	-0.063308	0.147717	55192
DNAJC17	tozasertib	-0.12208	0.492803	55192
DNAJC17	trametinib	0.0540273	0.511645	55192
DNAJC17	tretinoin	-0.159446	5.4423e-05	55192
DNAJC17	triazolothiadiazine	-0.232192	1.60915e-10	55192
DNAJC17	trifluoperazine	-0.0538464	0.302612	55192
DNAJC17	triptolide	-0.118017	0.00245449	55192
DNAJC17	tubastatin A	-0.0607938	0.34738	55192
DNAJC17	valdecoxib	-0.103698	0.00963005	55192
DNAJC17	vandetanib	0.0721936	0.143851	55192
DNAJC17	veliparib	-0.0293326	0.743132	55192
DNAJC17	vemurafenib	0.0194632	0.774483	55192
DNAJC17	vincristine	-0.219373	1.1105e-09	55192
DNAJC17	vorapaxar	-0.0933407	0.0380609	55192
DNAJC17	vorinostat	-0.153521	5.2298e-05	55192
DNAJC17	zebularine	-0.164536	2.0998e-05	55192
LARS1	16-beta-bromoandrosterone	-0.0163523	0.774164	51520
LARS1	1S,3R-RSL-3	-0.165601	1.802e-05	51520
LARS1	3-Cl-AHPC	-0.175301	3.28509e-06	51520
LARS1	968	-0.0181159	0.997324	51520
LARS1	A-804598	0.0237283	0.907402	51520
LARS1	AA-COCF3	-0.0690242	0.102267	51520
LARS1	ABT-199	-0.148954	0.0048923	51520
LARS1	ABT-737	-0.0647215	0.154807	51520
LARS1	AC55649	-0.0183554	0.909803	51520
LARS1	AGK-2	0.0222187	0.960072	51520
LARS1	AM-580	-0.0754873	0.128158	51520
LARS1	AT-406	-0.0244395	0.85078	51520
LARS1	AT13387	-0.103388	0.0806057	51520
LARS1	AT7867	-0.222548	7.31277e-09	51520
LARS1	AZ-3146	-0.169633	1.9051e-05	51520
LARS1	AZD1480	-0.162238	0.0130771	51520
LARS1	AZD4547	-0.101135	0.0239239	51520
LARS1	AZD6482	0.030905	0.62967	51520
LARS1	AZD7545	-0.167627	4.0489e-05	51520
LARS1	AZD7762	-0.196809	1.29644e-07	51520
LARS1	AZD8055	-0.0854035	0.0336728	51520
LARS1	B02	-0.160491	4.4628e-05	51520
LARS1	BCL-LZH-4	0.0422306	0.860821	51520
LARS1	BEC	0.0651564	0.999979	51520
LARS1	BI-2536	-0.34029	8.08574e-22	51520
LARS1	BIBR-1532	-0.133433	0.0017581	51520
LARS1	BIRB-796	-0.086784	0.0517366	51520
LARS1	BIX-01294	-0.0972526	0.0129208	51520
LARS1	BMS-195614	-0.0937047	0.0939448	51520
LARS1	BMS-270394	-0.0616596	0.181135	51520
LARS1	BMS-345541	-0.164935	1.88e-05	51520
LARS1	BMS-536924	-0.0399273	0.483068	51520
LARS1	BMS-754807	-0.0553277	0.234736	51520
LARS1	BRD-A02303741	-0.0962573	0.0575155	51520
LARS1	BRD-A05715709	0.0439789	0.780489	51520
LARS1	BRD-A71883111	-0.0633055	0.15143	51520
LARS1	BRD-A86708339	-0.0492949	0.439329	51520
LARS1	BRD-A94377914	-0.162657	0.00295965	51520
LARS1	BRD-K01737880	-0.278356	0.114128	51520
LARS1	BRD-K02251932	-0.0278101	0.627916	51520
LARS1	BRD-K02492147	0.0822198	0.145373	51520
LARS1	BRD-K04800985	0.00490377	0.999785	51520
LARS1	BRD-K09344309	-0.0416853	0.954221	51520
LARS1	BRD-K09587429	0.0354046	0.608113	51520
LARS1	BRD-K11533227	-0.112153	0.00843842	51520
LARS1	BRD-K13999467	-0.103372	0.0135854	51520
LARS1	BRD-K14844214	-0.00632001	0.950979	51520
LARS1	BRD-K16147474	0.00755147	0.989771	51520
LARS1	BRD-K17060750	0.110649	0.0180233	51520
LARS1	BRD-K19103580	-0.002879	0.964107	51520
LARS1	BRD-K24690302	-0.0228094	0.637509	51520
LARS1	BRD-K26531177	-0.156207	9.3647e-05	51520
LARS1	BRD-K27224038	-0.0238331	0.946922	51520
LARS1	BRD-K27986637	-0.0842047	0.585569	51520
LARS1	BRD-K28456706	-0.0791464	0.0588041	51520
LARS1	BRD-K29086754	-0.133238	0.432238	51520
LARS1	BRD-K29313308	-0.070415	0.102042	51520
LARS1	BRD-K30019337	0.0143699	0.976974	51520
LARS1	BRD-K30748066	-0.375587	0.0194934	51520
LARS1	BRD-K33199242	0.0310972	0.963835	51520
LARS1	BRD-K33514849	-0.128108	0.999288	51520
LARS1	BRD-K34099515	-0.0402773	0.967136	51520
LARS1	BRD-K34222889	-0.200445	7.33686e-08	51520
LARS1	BRD-K34485477	-0.0645062	0.998562	51520
LARS1	BRD-K35604418	-0.192641	5.37507e-07	51520
LARS1	BRD-K37390332	-0.0461311	0.822934	51520
LARS1	BRD-K41334119	0.00661528	0.995011	51520
LARS1	BRD-K41597374	-0.155394	6.3475e-05	51520
LARS1	BRD-K42260513	-0.0151778	0.998533	51520
LARS1	BRD-K44224150	-0.0209047	0.996828	51520
LARS1	BRD-K45681478	-0.0418953	0.377628	51520
LARS1	BRD-K48334597	-0.0887379	0.442117	51520
LARS1	BRD-K48477130	-0.027812	0.899794	51520
LARS1	BRD-K49290616	0.151032	0.643551	51520
LARS1	BRD-K50799972	-0.0990594	0.110186	51520
LARS1	BRD-K51490254	-0.0647159	0.131945	51520
LARS1	BRD-K51831558	-0.0943682	0.175408	51520
LARS1	BRD-K52037352	0.00556773	0.949712	51520
LARS1	BRD-K55116708	-0.135348	0.00141991	51520
LARS1	BRD-K61166597	-0.182092	3.01482e-06	51520
LARS1	BRD-K63431240	-0.109345	0.00834236	51520
LARS1	BRD-K64610608	0.0920704	0.378996	51520
LARS1	BRD-K66453893	-0.289024	3.07012e-15	51520
LARS1	BRD-K66532283	-0.1306	0.00100546	51520
LARS1	BRD-K70511574	-0.327705	1.92958e-19	51520
LARS1	BRD-K71781559	0.0297147	0.991525	51520
LARS1	BRD-K75293299	0.0811633	0.752098	51520
LARS1	BRD-K78574327	0.080007	0.968985	51520
LARS1	BRD-K80183349	-0.0956629	0.0156888	51520
LARS1	BRD-K84807411	-0.0404382	0.900766	51520
LARS1	BRD-K85133207	-0.0630729	0.158004	51520
LARS1	BRD-K86535717	0.176914	0.542036	51520
LARS1	BRD-K88742110	-0.0816206	0.0509432	51520
LARS1	BRD-K90370028	-0.0576954	0.898457	51520
LARS1	BRD-K92856060	-0.187464	2.17911e-06	51520
LARS1	BRD-K96431673	0.0717849	0.985799	51520
LARS1	BRD-K96970199	0.00350109	0.998764	51520
LARS1	BRD-K97651142	-0.208089	1.70111e-07	51520
LARS1	BRD-K99006945	-0.0507262	0.504283	51520
LARS1	BRD-M00053801	0.0493497	0.642027	51520
LARS1	BRD1378	0.0848959	0.297146	51520
LARS1	BRD1812	-0.149811	0.000128631	51520
LARS1	BRD1835	-0.0948819	0.0384366	51520
LARS1	BRD4132	-0.053896	0.395817	51520
LARS1	BRD5468	0.0201926	0.856019	51520
LARS1	BRD6340	-0.137842	0.000432224	51520
LARS1	BRD8899	0.0845291	0.378852	51520
LARS1	BRD8958	-0.00609588	0.99313	51520
LARS1	BRD9647	-0.0623708	0.219699	51520
LARS1	BRD9876	-0.00180214	0.982872	51520
LARS1	BYL-719	0.101908	0.0930393	51520
LARS1	Bax channel blocker	-0.13283	0.00178385	51520
LARS1	C6-ceramide	0.0496733	0.653825	51520
LARS1	CAL-101	-0.00186214	0.982546	51520
LARS1	CAY10576	0.0229571	0.786139	51520
LARS1	CAY10594	-0.0467018	0.435822	51520
LARS1	CAY10618	-0.207181	3.44173e-08	51520
LARS1	CBB-1007	0.0717773	0.649355	51520
LARS1	CCT036477	-0.157903	3.6483e-05	51520
LARS1	CD-1530	-0.013196	0.846328	51520
LARS1	CD-437	-0.218939	4.04214e-09	51520
LARS1	CHIR-99021	-0.201164	4.43672e-07	51520
LARS1	CHM-1	-0.274513	5.6301e-14	51520
LARS1	CI-976	0.0467409	0.748403	51520
LARS1	CID-5951923	0.0546118	0.518355	51520
LARS1	CIL41	-0.0980852	0.149229	51520
LARS1	CIL55	-0.0158339	0.953786	51520
LARS1	CIL55A	-0.159967	0.00574497	51520
LARS1	CIL56	-0.129965	0.0280342	51520
LARS1	CIL70	-0.219354	5.2757e-05	51520
LARS1	COL-3	-0.2551	6.56662e-09	51520
LARS1	CR-1-31B	-0.165357	7.8687e-06	51520
LARS1	Ch-55	-0.0547483	0.267223	51520
LARS1	Compound 1541A	-0.0510808	0.417931	51520
LARS1	Compound 23 citrate	-0.178724	3.37316e-06	51520
LARS1	Compound 7d-cis	-0.124379	0.00341367	51520
LARS1	DBeQ	-0.0715589	0.101107	51520
LARS1	DNMDP	0.0113483	0.904872	51520
LARS1	ELCPK	-0.269413	1.42275e-06	51520
LARS1	ETP-46464	-0.120232	0.0183817	51520
LARS1	EX-527	0.0705347	0.495736	51520
LARS1	FGIN-1-27	0.192589	0.0866172	51520
LARS1	FQI-1	-0.303793	5.35402e-09	51520
LARS1	FQI-2	-0.269778	1.08036e-13	51520
LARS1	FSC231	0.030752	0.99945	51520
LARS1	GANT-61	0.0445869	0.468992	51520
LARS1	GDC-0879	-0.0965762	0.0467727	51520
LARS1	GDC-0941	-0.0119363	0.829238	51520
LARS1	GMX-1778	-0.123579	0.00187606	51520
LARS1	GSK-3 inhibitor IX	-0.164066	5.2695e-05	51520
LARS1	GSK-J4	-0.201483	0.199595	51520
LARS1	GSK1059615	0.0836371	0.730691	51520
LARS1	GSK2636771	0.0718899	0.426095	51520
LARS1	GSK4112	-0.0165199	0.780837	51520
LARS1	GSK461364	-0.338729	1.03072e-20	51520
LARS1	GSK525762A	-0.229434	4.75674e-10	51520
LARS1	GW-405833	-0.179351	2.06694e-06	51520
LARS1	GW-843682X	-0.230596	2.98083e-09	51520
LARS1	HBX-41108	-0.0652106	0.249627	51520
LARS1	HC-067047	-0.00822978	0.919598	51520
LARS1	HLI 373	-0.118043	0.00363933	51520
LARS1	I-BET151	-0.221639	1.4951e-09	51520
LARS1	IC-87114	-0.00184438	0.985328	51520
LARS1	IPR-456	0.0366153	0.820072	51520
LARS1	ISOX	-0.194778	1.98887e-07	51520
LARS1	IU1	-0.000358164	0.997248	51520
LARS1	JQ-1	-0.223506	1.31678e-09	51520
LARS1	JW-480	-0.0632685	0.720432	51520
LARS1	JW-55	0.173355	0.146615	51520
LARS1	JW-74	-0.116565	0.116924	51520
LARS1	KH-CB19	0.047487	0.668149	51520
LARS1	KHS101	-0.103352	0.013363	51520
LARS1	KPT185	-0.184568	2.8529e-05	51520
LARS1	KU 0060648	-0.0997561	0.0132625	51520
LARS1	KU-0063794	-0.069739	0.0911159	51520
LARS1	KU-55933	-0.111413	0.0078318	51520
LARS1	KU-60019	-0.149207	0.000102878	51520
LARS1	KW-2449	-0.272123	1.04104e-13	51520
LARS1	KX2-391	-0.302836	1.41323e-16	51520
LARS1	Ki8751	-0.175744	1.4821e-05	51520
LARS1	Ko-143	-0.113886	0.00406945	51520
LARS1	L-685458	-0.0108704	0.89164	51520
LARS1	LE-135	-0.0798165	0.0658947	51520
LARS1	LRRK2-IN-1	-0.235975	9.81299e-08	51520
LARS1	LY-2157299	0.163775	0.410673	51520
LARS1	LY-2183240	-0.295843	3.5709e-16	51520
LARS1	MG-132	-0.148966	0.0517546	51520
LARS1	MGCD-265	-0.186775	8.83541e-07	51520
LARS1	MI-1	0.107144	0.126277	51520
LARS1	MI-2	-0.0379203	0.610056	51520
LARS1	MK-0752	0.121404	0.0813738	51520
LARS1	MK-1775	-0.220193	5.31113e-09	51520
LARS1	MK-2206	-0.0762474	0.0791043	51520
LARS1	ML006	-0.0361933	0.52162	51520
LARS1	ML029	-0.119424	0.00493172	51520
LARS1	ML031	-0.15187	0.000291663	51520
LARS1	ML050	-0.0700535	0.104466	51520
LARS1	ML083	0.085475	0.423185	51520
LARS1	ML162	-0.123579	0.00212366	51520
LARS1	ML203	0.0184263	0.760371	51520
LARS1	ML210	-0.213608	3.60196e-08	51520
LARS1	ML239	-0.142871	0.000379263	51520
LARS1	ML258	-0.0127526	0.923961	51520
LARS1	ML311	-0.265967	2.23871e-13	51520
LARS1	ML312	0.0588034	0.968701	51520
LARS1	ML320	-0.214619	4.41463e-07	51520
LARS1	ML334 diastereomer	0.0466633	0.539675	51520
LARS1	MLN2238	-0.179166	2.67662e-06	51520
LARS1	MLN2480	-0.0549492	0.608662	51520
LARS1	MST-312	-0.206744	4.34782e-08	51520
LARS1	Mdivi-1	-0.212936	7.68334e-08	51520
LARS1	Merck60	-0.215255	5.75204e-09	51520
LARS1	N9-isopropylolomoucine	-0.143649	0.000315054	51520
LARS1	NPC-26	-0.00765267	0.96698	51520
LARS1	NSC 74859	-0.108534	0.0238238	51520
LARS1	NSC19630	-0.115063	0.0162831	51520
LARS1	NSC23766	-0.0955922	0.0182574	51520
LARS1	NSC30930	0.0346514	0.651176	51520
LARS1	NSC48300	-0.207182	3.42891e-08	51520
LARS1	NSC632839	-0.179004	1.86127e-06	51520
LARS1	NSC95397	-0.218792	3.38686e-08	51520
LARS1	NVP-231	-0.254644	6.87634e-12	51520
LARS1	NVP-ADW742	-0.0412234	0.386949	51520
LARS1	NVP-BEZ235	-0.0515318	0.326819	51520
LARS1	NVP-BSK805	-0.154199	6.6889e-05	51520
LARS1	NVP-TAE684	-0.0858394	0.0585968	51520
LARS1	O-6-benzylguanine	-0.0344836	0.814705	51520
LARS1	OSI-027	-0.120145	0.00325543	51520
LARS1	OSI-930	-0.22011	1.53926e-07	51520
LARS1	PAC-1	-0.123761	0.00173905	51520
LARS1	PD 153035	0.187155	0.000152255	51520
LARS1	PD318088	0.0218171	0.700767	51520
LARS1	PDMP	-0.0831754	0.0507995	51520
LARS1	PF-184	-0.193215	4.26535e-07	51520
LARS1	PF-3758309	-0.241222	8.9242e-06	51520
LARS1	PF-4800567 hydrochloride	0.0497006	0.999586	51520
LARS1	PF-543	-0.00951857	0.865761	51520
LARS1	PF-573228	-0.218043	7.96202e-09	51520
LARS1	PF-750	-0.0849241	0.067751	51520
LARS1	PHA-793887	-0.221162	1.77325e-09	51520
LARS1	PI-103	-0.0470866	0.278257	51520
LARS1	PIK-93	-0.046695	0.284815	51520
LARS1	PL-DI	-0.21687	7.01516e-09	51520
LARS1	PLX-4720	-0.0118426	0.901545	51520
LARS1	PRIMA-1	-0.182906	2.16335e-06	51520
LARS1	PRIMA-1-Met	-0.0887486	0.201478	51520
LARS1	PRL-3 inhibitor I	0.0193288	0.910469	51520
LARS1	PX-12	-0.258197	2.95732e-12	51520
LARS1	PYR-41	0.0177164	0.774347	51520
LARS1	QS-11	-0.0339302	0.919064	51520
LARS1	QW-BI-011	-0.224335	0.00724903	51520
LARS1	R428	-0.138771	0.00429495	51520
LARS1	RAF265	-0.0619553	0.267551	51520
LARS1	RG-108	-0.121093	0.00384586	51520
LARS1	RITA	-0.0653784	0.12433	51520
LARS1	RO4929097	-0.0334804	0.689197	51520
LARS1	Repligen 136	-0.192788	2.04235e-06	51520
LARS1	SB-225002	-0.300689	5.41897e-17	51520
LARS1	SB-431542	0.0660013	0.458555	51520
LARS1	SB-525334	-0.00584888	0.932464	51520
LARS1	SB-743921	-0.266008	1.58339e-13	51520
LARS1	SCH-529074	-0.0746515	0.110415	51520
LARS1	SCH-79797	-0.203833	5.87137e-08	51520
LARS1	SGX-523	0.00948167	0.908146	51520
LARS1	SID 26681509	-0.125916	0.00368631	51520
LARS1	SJ-172550	-0.0945294	0.305277	51520
LARS1	SKI-II	-0.0867427	0.0469195	51520
LARS1	SMER-3	-0.101516	0.0220944	51520
LARS1	SN-38	-0.142271	0.000864535	51520
LARS1	SNS-032	-0.136654	0.000735412	51520
LARS1	SNX-2112	-0.160917	1.4406e-05	51520
LARS1	SR-II-138A	-0.184052	4.73177e-07	51520
LARS1	SR1001	-0.108631	0.0800724	51520
LARS1	SR8278	-0.0234289	0.958162	51520
LARS1	SRT-1720	-0.0806819	0.0696584	51520
LARS1	STF-31	-0.195743	3.97409e-07	51520
LARS1	SU11274	-0.169919	1.4245e-05	51520
LARS1	SZ4TA2	0.0455348	0.720384	51520
LARS1	StemRegenin 1	-0.154675	7.6718e-05	51520
LARS1	TG-100-115	0.0172183	0.786127	51520
LARS1	TG-101348	-0.16763	1.5474e-05	51520
LARS1	TGX-221	0.0147064	0.881343	51520
LARS1	TPCA-1	-0.156401	4.3265e-05	51520
LARS1	TW-37	-0.128379	0.00126616	51520
LARS1	UNC0321	0.0739687	0.442139	51520
LARS1	UNC0638	-0.0340373	0.466022	51520
LARS1	VAF-347	0.133846	0.0214179	51520
LARS1	VER-155008	-0.134958	0.000898217	51520
LARS1	VU0155056	0.0582127	0.822603	51520
LARS1	WAY-362450	0.0540376	0.998521	51520
LARS1	WP1130	-0.135343	0.000621502	51520
LARS1	WZ4002	0.0529348	0.466551	51520
LARS1	WZ8040	0.1013	0.0353747	51520
LARS1	XL765	0.0175869	0.809629	51520
LARS1	YK 4-279	-0.244931	2.4207e-11	51520
LARS1	YM-155	-0.126742	0.00492657	51520
LARS1	ZSTK474	0.0462542	0.405775	51520
LARS1	abiraterone	0.074088	0.605267	51520
LARS1	afatinib	0.0894825	0.0497803	51520
LARS1	alisertib	-0.264689	9.07279e-13	51520
LARS1	alvocidib	-0.206222	0.000244411	51520
LARS1	apicidin	-0.160971	1.5432e-05	51520
LARS1	austocystin D	0.166684	9.639e-05	51520
LARS1	avicin D	-0.10629	0.188841	51520
LARS1	avrainvillamide	-0.148657	0.00160729	51520
LARS1	axitinib	-0.239141	1.20139e-10	51520
LARS1	azacitidine	-0.126149	0.00608073	51520
LARS1	bafilomycin A1	0.00991121	0.989893	51520
LARS1	barasertib	-0.217983	6.88894e-09	51520
LARS1	bardoxolone methyl	-0.183276	6.7114e-06	51520
LARS1	belinostat	-0.159442	0.0038636	51520
LARS1	bendamustine	-0.0994885	0.0193057	51520
LARS1	betulinic acid	0.0269532	0.887642	51520
LARS1	bexarotene	-0.105264	0.0129051	51520
LARS1	birinapant	0.054302	0.397816	51520
LARS1	blebbistatin	0.0749977	0.905208	51520
LARS1	bleomycin A2	-0.00863838	0.905389	51520
LARS1	bortezomib	-0.187123	1.157e-06	51520
LARS1	bosutinib	-0.0958737	0.0187067	51520
LARS1	brefeldin A	-0.0252301	0.612947	51520
LARS1	brivanib	-0.229834	4.1139e-09	51520
LARS1	cabozantinib	-0.0731043	0.120149	51520
LARS1	canertinib	0.0724883	0.113366	51520
LARS1	cediranib	-0.0306723	0.836271	51520
LARS1	ceranib-2	-0.267803	1.59007e-13	51520
LARS1	cerulenin	-0.127706	0.000891488	51520
LARS1	chlorambucil	-0.268248	6.53993e-13	51520
LARS1	ciclopirox	-0.15561	2.8372e-05	51520
LARS1	ciclosporin	-0.00040981	0.995748	51520
LARS1	cimetidine	0.0473953	0.972471	51520
LARS1	clofarabine	-0.220123	1.7035e-09	51520
LARS1	crizotinib	-0.23274	5.15262e-10	51520
LARS1	cucurbitacin I	-0.135836	0.000639702	51520
LARS1	curcumin	-0.18647	7.62323e-07	51520
LARS1	cyanoquinoline 11	0.0207127	0.848828	51520
LARS1	cyclophosphamide	0.0666614	0.993392	51520
LARS1	cytarabine hydrochloride	-0.230413	3.36989e-10	51520
LARS1	cytochalasin B	-0.10766	0.0221992	51520
LARS1	dabrafenib	-0.161526	0.016372	51520
LARS1	dacarbazine	-0.177685	2.97971e-06	51520
LARS1	daporinad	-0.227956	3.67586e-08	51520
LARS1	darinaparsin	-0.059726	0.38034	51520
LARS1	dasatinib	0.0391208	0.442987	51520
LARS1	decitabine	-0.187075	4.27508e-07	51520
LARS1	dexamethasone	-0.0167994	0.725018	51520
LARS1	dinaciclib	-0.191568	0.000538343	51520
LARS1	docetaxel	-0.240697	2.1916e-05	51520
LARS1	doxorubicin	-0.235246	8.76479e-11	51520
LARS1	elocalcitol	-0.189805	6.52572e-07	51520
LARS1	entinostat	-0.147517	0.000111754	51520
LARS1	epigallocatechin-3-monogallate	-0.12867	0.00281899	51520
LARS1	erastin	-0.202634	3.07252e-07	51520
LARS1	erismodegib	0.0596896	0.425479	51520
LARS1	erlotinib	0.123223	0.00306133	51520
LARS1	etomoxir	-0.0438768	0.948445	51520
LARS1	etoposide	-0.232787	2.5601e-10	51520
LARS1	fingolimod	-0.0999348	0.0114479	51520
LARS1	fluorouracil	-0.186995	7.75081e-07	51520
LARS1	fluvastatin	-0.0656697	0.20332	51520
LARS1	foretinib	-0.157411	7.7706e-05	51520
LARS1	fulvestrant	-0.0393736	0.934531	51520
LARS1	fumonisin B1	0.00380248	0.965708	51520
LARS1	gefitinib	0.0876754	0.0641884	51520
LARS1	gemcitabine	-0.211464	5.27223e-08	51520
LARS1	gossypol	-0.189396	1.25428e-06	51520
LARS1	hyperforin	0.0511029	0.543674	51520
LARS1	ibrutinib	0.0774055	0.175955	51520
LARS1	ifosfamide	0.081914	0.648988	51520
LARS1	imatinib	-0.145738	0.000340929	51520
LARS1	importazole	-0.0311225	0.649524	51520
LARS1	indisulam	-0.248896	5.91938e-11	51520
LARS1	isoevodiamine	-0.255003	3.86437e-12	51520
LARS1	isoliquiritigenin	-0.230831	0.00481181	51520
LARS1	isonicotinohydroxamic acid	-0.0898754	0.95765	51520
LARS1	istradefylline	-0.0689318	0.660455	51520
LARS1	itraconazole	-0.0939402	0.132182	51520
LARS1	lapatinib	0.0816403	0.0646127	51520
LARS1	lenvatinib	-0.0417843	0.386869	51520
LARS1	leptomycin B	-0.215189	3.30079e-09	51520
LARS1	linifanib	-0.159522	2.6888e-05	51520
LARS1	linsitinib	-0.00376045	0.94476	51520
LARS1	lomeguatrib	-0.0409824	0.481722	51520
LARS1	lovastatin	-0.0536523	0.298273	51520
LARS1	manumycin A	-0.203595	4.59976e-08	51520
LARS1	marinopyrrole A	-0.1911	9.3322e-05	51520
LARS1	masitinib	-0.144519	0.000312134	51520
LARS1	methotrexate	-0.19962	5.42594e-07	51520
LARS1	methylstat	-0.19127	3.4618e-05	51520
LARS1	mitomycin	-0.169927	6.71765e-06	51520
LARS1	momelotinib	-0.165858	2.8235e-05	51520
LARS1	myricetin	0.035636	0.760603	51520
LARS1	myriocin	0.11385	0.826355	51520
LARS1	nakiterpiosin	-0.299785	2.71267e-16	51520
LARS1	narciclasine	-0.241407	1.05683e-10	51520
LARS1	navitoclax	-0.0870587	0.0378189	51520
LARS1	necrostatin-1	-0.111016	0.0128259	51520
LARS1	necrostatin-7	-0.0595663	0.195855	51520
LARS1	necrosulfonamide	-0.242829	8.79289e-08	51520
LARS1	nelarabine	0.0223044	0.943188	51520
LARS1	neopeltolide	-0.23528	0.00624027	51520
LARS1	neratinib	0.0696246	0.109572	51520
LARS1	neuronal differentiation inducer III	-0.1166	0.00241128	51520
LARS1	niclosamide	-0.159132	8.7243e-05	51520
LARS1	nilotinib	-0.0353084	0.684668	51520
LARS1	nintedanib	-0.0428504	0.450962	51520
LARS1	nutlin-3	-0.0950012	0.0186507	51520
LARS1	obatoclax	-0.19678	1.47054e-07	51520
LARS1	olaparib	-0.178988	2.877e-06	51520
LARS1	oligomycin A	-0.168575	1.4129e-05	51520
LARS1	omacetaxine mepesuccinate	-0.201211	5.87877e-06	51520
LARS1	ouabain	-0.206374	2.79424e-08	51520
LARS1	paclitaxel	-0.242291	7.71797e-11	51520
LARS1	palmostatin B	-0.0470551	0.687937	51520
LARS1	pandacostat	-0.016674	0.750259	51520
LARS1	panobinostat	-0.144626	0.000112099	51520
LARS1	parbendazole	-0.289266	7.93426e-16	51520
LARS1	parthenolide	0.0485519	0.407361	51520
LARS1	pazopanib	-0.167281	1.4128e-05	51520
LARS1	pevonedistat	-0.269882	1.09182e-12	51520
LARS1	phloretin	-0.236619	3.72259e-10	51520
LARS1	pifithrin-alpha	-0.0813036	0.14046	51520
LARS1	pifithrin-mu	-0.129611	0.000888172	51520
LARS1	piperlongumine	-0.208834	1.60385e-08	51520
LARS1	pitstop2	-0.036187	0.867041	51520
LARS1	pluripotin	-0.101737	0.0243837	51520
LARS1	procarbazine	0.00604011	0.982729	51520
LARS1	prochlorperazine	-0.089162	0.0437815	51520
LARS1	purmorphamine	-0.0677458	0.151075	51520
LARS1	pyrazolanthrone	-0.0663824	0.17496	51520
LARS1	quizartinib	-0.0595978	0.310242	51520
LARS1	regorafenib	-0.0874407	0.0667867	51520
LARS1	rigosertib	-0.317415	1.10223e-17	51520
LARS1	ruxolitinib	-0.16394	3.4956e-05	51520
LARS1	salermide	0.0145394	0.914261	51520
LARS1	saracatinib	0.0670183	0.155994	51520
LARS1	selumetinib	0.0188632	0.752235	51520
LARS1	semagacestat	0.0567631	0.644779	51520
LARS1	serdemetan	-0.0909628	0.0251621	51520
LARS1	sildenafil	-0.0236913	0.869537	51520
LARS1	silmitasertib	0.00907451	0.936334	51520
LARS1	simvastatin	-0.0108368	0.8857	51520
LARS1	sirolimus	-0.0557172	0.173733	51520
LARS1	sitagliptin	0.0995425	0.997718	51520
LARS1	skepinone-L	-0.0858511	0.174415	51520
LARS1	sorafenib	-0.139225	0.00082608	51520
LARS1	sotrastaurin	-0.242349	6.15287e-08	51520
LARS1	spautin-1	-0.0727297	0.128676	51520
LARS1	staurosporine	-0.142614	0.203007	51520
LARS1	sunitinib	-0.108952	0.00615981	51520
LARS1	tacedinaline	-0.168374	0.000214358	51520
LARS1	tacrolimus	-0.221108	3.29535e-08	51520
LARS1	tamatinib	0.0412629	0.626797	51520
LARS1	tamoxifen	-0.0150917	0.860338	51520
LARS1	tandutinib	-0.0598376	0.184693	51520
LARS1	tanespimycin	0.00931625	0.890199	51520
LARS1	temozolomide	-0.0534129	0.404102	51520
LARS1	temsirolimus	-0.0251747	0.729169	51520
LARS1	teniposide	-0.297933	6.44758e-09	51520
LARS1	thalidomide	-0.0372504	0.871136	51520
LARS1	tigecycline	-0.163873	0.00446123	51520
LARS1	tipifarnib-P1	-0.0711783	0.0753707	51520
LARS1	tipifarnib-P2	-0.19013	0.000338829	51520
LARS1	tivantinib	-0.244394	7.5491e-06	51520
LARS1	tivozanib	-0.0828546	0.074812	51520
LARS1	topotecan	-0.20351	2.8722e-08	51520
LARS1	tosedostat	-0.122663	0.00301595	51520
LARS1	tozasertib	-0.341229	0.0248753	51520
LARS1	trametinib	0.0216308	0.818146	51520
LARS1	tretinoin	-0.0991824	0.0151068	51520
LARS1	triazolothiadiazine	-0.321277	2.00778e-19	51520
LARS1	trifluoperazine	-0.0359494	0.523358	51520
LARS1	triptolide	-0.129146	0.000884774	51520
LARS1	tubastatin A	-0.0729759	0.249972	51520
LARS1	valdecoxib	-0.140782	0.0003635	51520
LARS1	vandetanib	0.156552	0.000409726	51520
LARS1	veliparib	-0.0556785	0.463017	51520
LARS1	vemurafenib	0.0529284	0.348344	51520
LARS1	vincristine	-0.286478	7.40812e-16	51520
LARS1	vorapaxar	-0.0699232	0.132993	51520
LARS1	vorinostat	-0.195726	1.80534e-07	51520
LARS1	zebularine	-0.262552	5.86119e-12	51520
